# Supplementary material
Source: HighWire-hosted journal article supplement (https://rmdopen.bmj.com/content/8/2/e002686)
Supplement: inline-supplementary-material-1 [file inline-supplementary-material-1.pdf]

**Table S1 Main effects of Dapagliflozin in SLE patients with diabetes**

| N                                 | 1         | 2                | 3      | 4                | 5     |
|-----------------------------------|-----------|------------------|--------|------------------|-------|
| Age/sex                           | 60/F      | 33/F             | 45/F   | 32/F             | 55/F  |
| Antidiabetic drugs                | Glipizide | Acarbose,<br>IRI | IRI    | Acarbose,<br>IRI | IRI   |
| eGFR baseline                     | 102.49    | 142.6            | 77.0   | 134.1            | 60.96 |
| eGFR 6 months                     | 96.94     | 104.7            | 96.3   | 143.7            | 73.70 |
| Proteinuria at baseline (g/24h)   | -         | 2.89             | 1.89   | -                | 1.7   |
| Proteinuria at 6 months (g/24h)   | -         | 1.45             | 2.08   | -                | 7.05  |
| HbA1c baseline (%)                | 6.8       | 17.9             | 9.4    | 7.6              | 7.6   |
| HbA1c 6 months (%)                | 6.9       | 5.6              | 7.2    | 6.9              | 6.9   |
| FBG baseline (mmol/L)             | 5.71      | 9.68             | 6      | 10.2             | 10.1  |
| FBG 6 months (mmol/L)             | 5.84      | 4.82             | 5.91   | 6.97             | 7.27  |
| SBP baseline (mmHg)               | 115/71    | 114 / 87         | 120/80 | 124/101          | -     |
| SBP 6 months (mmHg)               | 122/76    | 142/98           | 129/90 | 118/90           | -     |
| BMI baseline (kg/m <sup>2</sup> ) | 25.36     | 18.29            | 24.35  | 21.26            | 21.48 |
| BMI 6 months (kg/m <sup>2</sup> ) | 21.91     | 18.65            | 23.31  | 19.84            | 20.31 |

IRI, insulin; FBG, fasting blood-glucose; HbA1c, glycosylated hemoglobin; SBP, systolic blood pressure; BMI, body mass index.
